# Supplementary material for: Genetic Diversity and Population Structure of the Peruvian Andean Legume, tarwi (Lupinus mutabilis), With High Quality SNPs
Source: Preprints.org preprint supplement (doi:10.20944/preprints202301.0345.v1), 2023-01-19
Supplement: Supplementary file 1 [file Supplementary table.xlsx]

## Sheet: Hoja1
Table S1. The 162 accessions of Daucus, and two accessions of related genera characterized in this study, improvement status, locality information and new identification.
Accessions	Location or Source *	Region
TLM67	Cusco. Canchis: UNSAAC (Genebank)	South
TLM100	Cusco. Canchis: UNSAAC (Genebank)	South
TLM132	Cusco. Quispicanchis: UNSAAC (Genebank)	South
TLM168	Cusco. Cusco: INIA (Genebank)	South
TLM39	Apurimac. Andahuaylas	South
TLM16	Puno. Yunguyo	South
TLM26-A	Junin. Huancayo: UNCP (Genebank)	Center
TLM73	Junin. Huancayo: UNSAAC (Genebank)	Center
TLM101	Puno. Plateria: UNSAAC (Genebank)	South
TLM134	Cusco. Anta: UNSAAC (Genebank)	South
TLM169	Cusco. Cusco: INIA (Genebank)	South
TLM39-1	Apurimac. Andahuaylas	South
TLM12	La Libertad. Otuzco	North
TLM60	La Libertad. Sanchez Carrion	North
TLM54	Junin. Jauja	Center
TLM75	Apurimac. Abancay: UNSAAC (Genebank)	South
TLM103	Cusco. Acomayo: UNSAAC (Genebank)	South
TLM143	Cusco. Paucartambo: UNSAAC (Genebank)	South
TLM170	Huancavelica. Tayacaja: INIA (Genebank)	Center
TLM28	Ancash. Huari	North
TLM48	Ancash. Carhuaz	North
TLM55	Puno. Puno: UNALM (Genebank UNAP)	South
TLM77	Puno. Huancane: UNSAAC (Genebank)	South
TLM104	Cusco. Acomayo: UNSAAC (Genebank)	South
TLM146	Cusco. Paruro: UNSAAC (Genebank)	South
TLM171	Huancavelica. Tayacaja: INIA (Genebank)	Center
TLM29	La Libertad. Huamachuco	North
TLM12-2	La Libertad. Otuzco	North
TLM49	Ancash. Carhuaz	North
TLM12-CV	La Libertad. Otuzco	North
TLM81	Cusco. Cusco: UNSAAC (Genebank)	South
TLM106	Cajamarca. Cajamarca: UNSAAC (Genebank)	North
TLM149	Cusco. Paucartambo: UNSAAC (Genebank)	South
TLM172	Huancavelica. Tayacaja: INIA (Genebank)	Center
TLM40	Puno. Yunguyo	South
TLM09_p1	Ancash. Huaraz	North
TLM50	Ancash. Carhuaz	North
TLM14-H2	Ancash. Huaraz	North
TLM83	Cusco. Urubamba: UNSAAC (Genebank)	South
TLM107	Cusco. Canchis: UNSAAC (Genebank)	South
TLM150	Cusco. Anta: UNSAAC (Genebank)	South
TLM173	Huancavelica. Tayacaja: INIA (Genebank)	Center
TLM18	Puno. Yunguyo: UNAP (Genebank)	South
TLM30	Huanuco. Huanuco	Center
TLM51	Ancash. Carhuaz	North
TLM88	Cusco. Anta: UNSAAC (Genebank)	South
TLM109	Cusco. Paucartambo: UNSAAC (Genebank)	South
TLM152	Cusco. Chuquisaca: UNSAAC (Genebank)	South
TLM177	Junin. Huancayo: INIA (Genebank)	Center
TLM41	Puno. Yunguyo (vendor)	South
TLM14	Ancash. Huaraz	North
TLM52	Ancash. Carhuaz	North
TLM90	Cusco. Anta: UNSAAC (Genebank)	South
TLM110	Cusco. Paucartambo: UNSAAC (Genebank)	South
TLM156	Cusco. Cusco: UNSAAC (Genebank)	South
TLM179	Puno. Yunguyo: INIA (Genebank)	South
TLM42	Puno. Yunguyo: UNALM	South
TLM13	Junin. Huancayo: INIA (Genebank)	Center
TLM53	Ancash. Carhuaz: UNALM	North
TLM57	Ancash. Carhuaz	North
TLM91	Cusco. Anta: UNSAAC (Genebank)	South
TLM114	Huanuco. Grau: UNSAAC (Genebank)	Center
TLM157	Cusco. Cusco: UNSAAC (Genebank)	South
TLM180	Puno. Chucuito: INIA (Genebank)	South
TLM43	Puno. Yunguyo (vendor)	South
TLM32	Puno. Yunguyo: UNALM	South
TLM46	Puno. Puno	South
TLM58	Ancash. Huaraz: UNALM	North
TLM92	Cusco. Anta: UNSAAC (Genebank)	South
TLM116	Cusco. Canchis: UNSAAC (Genebank)	South
TLM162	Cajamarca. Celendin: INIA (Genebank)	North
TLM181	Puno. Yunguyo: INIA (Genebank)	South
TLM44	Puno. Yunguyo (vendor)	South
TLM33	Huanuco. Huanuco	Center
TLM21	Cusco. Cusco: UNSAAC (Genebank)	South
TLM59	Ancash. Huaraz	North
TLM93	Cusco. Quispicanchis: UNSAAC (Genebank)	South
TLM126	Cusco. Calca: UNSAAC (Genebank)	South
TLM163	Cajamarca. Celendin: INIA (Genebank)	North
TLM09_p2	Ancash. Huaraz: UNALM	North
TLM23	Cusco. Cusco: UNSAAC (Genebank)	South
TLM26	Junin. Huancayo: UNCP (Genebank)	Center
TLM98	Cusco. Canchis: UNSAAC (Genebank)	South
TLM131	Cusco. Paucartambo: UNSAAC (Genebank)	South
TLM167	Cusco. Paucartambo: INIA (Genebank)	South
TLM38	Apurimac. Andahuaylas: UNALM	South
TLM15	Puno. Puno: UNAP (Genebank)	South
TLM07	Cusco. Cusco: UNALM	South
TLM27	Junin. Huancayo: UNCP (Genebank)	Center
Universidad Nacional San Antonio Abad del Cusco (UNSAAC) Instituto Nacional de Innovación Agraria (INIA) Universidad Nacional de Innovación Agraria (UNALM) Universidad Nacional del Centro del Perú (UNCP) Universidad del Altiplano (UNAP) *If the accession was obtained through another entity (vendor, genebank), the source is indicated within parenthesis
